# Supplementary material for: Linked vaccine adverse event data from VAERS for biomedical data analysis and longitudinal studies
Source: BioData Min. 2014 Dec 31;7:36. doi: 10.1186/s13040-014-0036-y (PMC4333877; doi:10.1186/s13040-014-0036-y)
Supplement: Additional file 1: — Vaccine-adverse event network reconstructed from extracted from VAERS reports in 1990. Green rectangle: vaccine; yellow vee: adverse event. Edge: vaccine-adverse event association with PRR ratio greater than 1. Edge width denotes the PRR ratio of the edge. [file 13040_2014_36_MOESM1_ESM.xlsx]

## Sheet: Sheet1
Year	VAXTYPE	SYMPTOM	PRR_RATIOBYYEAR
1990	ADEN	Asthenia	10.2036
1990	ADEN	Guillain-Barre syndrome	61.2214
1990	ADEN	Hypokinesia	37.2652
1990	ADEN	Laboratory test abnormal	61.2214
1990	ADEN	Pharyngitis	22.5553
1990	ANTH	Abdominal pain	3.2048
1990	ANTH	Anaemia	47.4306
1990	ANTH	Angina pectoris	237.153
1990	ANTH	Arthralgia	3.9791
1990	ANTH	Arthritis	3.7643
1990	ANTH	Back pain	8.7834
1990	ANTH	Chest pain	3.5396
1990	ANTH	Depression	43.1187
1990	ANTH	Diplopia	237.153
1990	ANTH	Fatigue	237.153
1990	ANTH	Gastritis	237.153
1990	ANTH	Hypertension	23.7153
1990	ANTH	Hypoaesthesia	18.2425
1990	ANTH	Injection site hypersensitivity	1.1402
1990	ANTH	Laboratory test abnormal	4.2349
1990	ANTH	Lymphadenopathy	1.5916
1990	ANTH	Multiple sclerosis	23.7153
1990	ANTH	Muscle spasms	11.293
1990	ANTH	Muscle twitching	6.0808
1990	ANTH	Myalgia	5.8701
1990	ANTH	Paraesthesia	1.5202
1990	ANTH	Rash	1.174
1990	ANTH	Shock	12.4817
1990	ANTH	Skin nodule	23.7153
1990	ANTH	Tinnitus	43.1187
1990	ANTH	Vertigo	12.4817
1990	ANTH	Visual disturbance	9.4861
1990	ANTH	White blood cell disorder	47.4306
1990	CHOL	Arthralgia	2.8356
1990	CHOL	Asthenia	5.1125
1990	CHOL	Chills	5.4199
1990	CHOL	Diarrhoea	3.8574
1990	CHOL	Headache	5.2058
1990	CHOL	Laboratory test abnormal	15.292
1990	CHOL	Lymphadenopathy	11.5723
1990	CHOL	Myalgia	4.157
1990	CHOL	Oedema	4.1171
1990	CHOL	Pain	2.2359
1990	CHOL	Pharyngitis	5.6339
1990	CHOL	Pyrexia	1.3067
1990	CHOL	Rash	1.4085
1990	CHOL	Skin ulcer	214.088
1990	CHOL	Vomiting	2.4123
1990	DPP	Convulsion	37.8499
1990	DT	Abscess	20.2702
1990	DT	Anaphylactoid reaction	7.0946
1990	DT	Angioneurotic oedema	14.1892
1990	DT	Anorexia	1.0831
1990	DT	Arthritis	2.2522
1990	DT	Asthma	3.2619
1990	DT	Bradycardia	11.8243
1990	DT	Cellulitis	3.9414
1990	DT	Chills	1.8075
1990	DT	Deafness	21.8295
1990	DT	Dermatitis bullous	12.8992
1990	DT	Diarrhoea	1.2841
1990	DT	Dizziness	1.051
1990	DT	Dyspepsia	15.7657
1990	DT	Erythema multiforme	15.7657
1990	DT	Face oedema	1.3386
1990	DT	Febrile convulsion	1.8191
1990	DT	Gaze palsy	3.4191
1990	DT	Guillain-Barre syndrome	2.5338
1990	DT	Haemorrhage	10.9147
1990	DT	Headache	1.2978
1990	DT	Hyperhidrosis	1.8191
1990	DT	Hypotension	3.4608
1990	DT	Hypothermia	94.5944
1990	DT	Hypotonia	1.2501
1990	DT	Hypoventilation	15.7657
1990	DT	Influenza	1.1351
1990	DT	Injection site abscess	8.1081
1990	DT	Injection site pain	1.7304
1990	DT	Injection site reaction	2.6828
1990	DT	Insomnia	5.0676
1990	DT	Lymphadenopathy	1.9175
1990	DT	Nausea	2.5798
1990	DT	Oedema	1.3709
1990	DT	Otitis media	4.9497
1990	DT	Palpitations	12.8992
1990	DT	Pruritus	2.3389
1990	DT	Rhinitis	2.9561
1990	DT	Serum sickness	4.1733
1990	DT	Stupor	2.9561
1990	DT	Syncope	3.9414
1990	DT	Tachycardia	4.7297
1990	DT	Urticaria	3.0846
1990	DT	Vasodilatation	1.8427
1990	DTAP	Abasia	856.85
1990	DTAP	Convulsion	3.783
1990	DTAP	Diarrhoea	7.7194
1990	DTAP	Dyspnoea	13.9325
1990	DTAP	Mental retardation severity unspecified	50.4029
1990	DTAP	Oedema peripheral	55.2806
1990	DTAP	Pyrexia	1.7425
1990	DTAP	Visual disturbance	68.548
1990	DTAP	Vomiting	4.8273
1990	DTP	Abdominal distension	1.0797
1990	DTP	Abnormal behaviour	1.6195
1990	DTP	Abnormal dreams	3.2391
1990	DTP	Abscess	1.0797
1990	DTP	Adrenal cortex necrosis	3.2391
1990	DTP	Adrenal haemorrhage	3.2391
1990	DTP	Affect lability	1.6195
1990	DTP	Agitation	2.8841
1990	DTP	Anorexia	1.791
1990	DTP	Apnoea	2.2026
1990	DTP	Apraxia	3.2391
1990	DTP	Arrhythmia	1.0797
1990	DTP	Asthma	1.0636
1990	DTP	Autism	1.2146
1990	DTP	Blood creatine phosphokinase increased	1.0797
1990	DTP	Bronchiolitis	1.2146
1990	DTP	Cardiac arrest	1.2956
1990	DTP	Cardiovascular disorder	3.2391
1990	DTP	Cellulitis	1.0411
1990	DTP	Cerebral infarction	1.0797
1990	DTP	Coagulopathy	1.3882
1990	DTP	Coma	1.7668
1990	DTP	Convulsion	2.2074
1990	DTP	Crying	3.0932
1990	DTP	Cyanosis	2.7556
1990	DTP	Death	3.2391
1990	DTP	Delirium	1.9434
1990	DTP	Dementia	1.0797
1990	DTP	Depressed level of consciousness	3.2391
1990	DTP	Drooling	3.2391
1990	DTP	Drug toxicity	3.2391
1990	DTP	Eczema	1.6195
1990	DTP	Encephalopathy	2.6992
1990	DTP	Endocrine disorder	3.2391
1990	DTP	Erythema	1.0797
1990	DTP	Febrile convulsion	1.8787
1990	DTP	Flatulence	1.0797
1990	DTP	Gait disturbance	1.5637
1990	DTP	Gastrointestinal disorder	1.6195
1990	DTP	Gaze palsy	1.8595
1990	DTP	Globulins decreased	3.2391
1990	DTP	Grand mal convulsion	1.495
1990	DTP	Hallucination	1.6195
1990	DTP	Hemiplegia	1.6195
1990	DTP	Hydrocephalus	3.2391
1990	DTP	Hydronephrosis	3.2391
1990	DTP	Hypertonia	1.5865
1990	DTP	Hypochromic anaemia	1.6195
1990	DTP	Hypoglycaemia	1.6195
1990	DTP	Hypokinesia	1.7815
1990	DTP	Hyponatraemia	3.2391
1990	DTP	Hypotension	1.1493
1990	DTP	Hypothermia	2.1594
1990	DTP	Hypotonia	3.6289
1990	DTP	Hypoventilation	1.3882
1990	DTP	Immune system disorder	1.9434
1990	DTP	Injection site abscess	2.2085
1990	DTP	Injection site atrophy	1.6195
1990	DTP	Injection site hypersensitivity	1.1855
1990	DTP	Injection site inflammation	5.6684
1990	DTP	Injection site mass	1.2092
1990	DTP	Injection site oedema	1.3803
1990	DTP	Injection site reaction	1.8122
1990	DTP	Injury	1.0797
1990	DTP	Insomnia	2.2864
1990	DTP	Intracranial pressure increased	3.2391
1990	DTP	Lacrimal disorder	1.0797
1990	DTP	Lethargy	1.6195
1990	DTP	Leukocytosis	1.2458
1990	DTP	Leukoplakia oral	3.2391
1990	DTP	Meningitis	1.8509
1990	DTP	Mental retardation severity unspecified	1.914
1990	DTP	Muscle atrophy	2.1594
1990	DTP	Muscle haemorrhage	3.2391
1990	DTP	Muscle spasms	2.2424
1990	DTP	Muscle twitching	1.3882
1990	DTP	Musculoskeletal stiffness	6.4781
1990	DTP	Mydriasis	3.2391
1990	DTP	Myocarditis	1.6195
1990	DTP	Myoclonus	1.3882
1990	DTP	Neoplasm	6.4781
1990	DTP	Nervous system disorder	1.0797
1990	DTP	Nervousness	1.4396
1990	DTP	Neurodevelopmental disorder	3.2391
1990	DTP	Nystagmus	1.0797
1990	DTP	Oedema	1.3977
1990	DTP	Opisthotonus	3.2391
1990	DTP	Otitis media	1.7312
1990	DTP	Pallor	3.0891
1990	DTP	Paralysis flaccid	3.2391
1990	DTP	Peripheral vascular disorder	2.1594
1990	DTP	Personality disorder	1.2146
1990	DTP	Pneumothorax	3.2391
1990	DTP	Poliomyelitis	3.2391
1990	DTP	Productive cough	1.0797
1990	DTP	Pulmonary oedema	2.1594
1990	DTP	Pulse absent	3.2391
1990	DTP	Pyelonephritis	1.0797
1990	DTP	Pyrexia	1.8428
1990	DTP	Respiratory arrest	3.2391
1990	DTP	Respiratory tract congestion	3.2391
1990	DTP	Restlessness	3.2391
1990	DTP	Resuscitation	3.2391
1990	DTP	Salivary hypersecretion	1.4396
1990	DTP	Screaming	4.5028
1990	DTP	Sepsis	1.1337
1990	DTP	Shock	1.7441
1990	DTP	Similar reaction on previous exposure to drug	1.6195
1990	DTP	Skin discolouration	1.495
1990	DTP	Sleep disorder	3.2391
1990	DTP	Somnolence	2.8243
1990	DTP	Staring	3.2391
1990	DTP	Stupor	3.1095
1990	DTP	Subarachnoid haemorrhage	3.2391
1990	DTP	Subcutaneous nodule	1.0797
1990	DTP	Subdural haematoma	3.2391
1990	DTP	Sudden infant death syndrome	2.7532
1990	DTP	Supraventricular tachycardia	2.1594
1990	DTP	Tendon disorder	1.0797
1990	DTP	Tetany	1.6195
1990	DTP	Thinking abnormal	1.2146
1990	DTP	Tremor	2.0794
1990	DTP	Urinary retention	1.6195
1990	DTP	Vascular anomaly	1.6195
1990	DTP	Ventricular fibrillation	3.2391
1990	DTP	Vomiting	1.3007
1990	DTP	Weight increased	3.2391
1990	DTPHIB	Injection site hypersensitivity	41.2139
1990	DTPHIB	Injection site oedema	34.29
1990	FLU	Abscess	4.6067
1990	FLU	Ageusia	13.8202
1990	FLU	Albuminuria	6.9101
1990	FLU	Amnesia	1.382
1990	FLU	Anaphylactoid reaction	1.4548
1990	FLU	Anxiety	9.2135
1990	FLU	Arthritis	1.9743
1990	FLU	Asthenia	2.4077
1990	FLU	Back pain	3.0044
1990	FLU	Bradycardia	1.1517
1990	FLU	Brain oedema	13.8202
1990	FLU	Bronchitis	3.7692
1990	FLU	Cardiac arrest	1.6584
1990	FLU	Cardiac failure	2.764
1990	FLU	Central nervous system neoplasm	13.8202
1990	FLU	Cerebral infarction	4.6067
1990	FLU	Cerebrovascular accident	13.8202
1990	FLU	Chest pain	2.3828
1990	FLU	Chills	2.8269
1990	FLU	Coordination abnormal	1.8846
1990	FLU	Cough	3.9733
1990	FLU	CSF test abnormal	2.5913
1990	FLU	Delirium	1.9743
1990	FLU	Dementia	4.6067
1990	FLU	Depression	4.1461
1990	FLU	Dermatitis bullous	1.2564
1990	FLU	Dizziness	1.9743
1990	FLU	Dry mouth	2.764
1990	FLU	Dyspepsia	1.5356
1990	FLU	Dysphagia	3.4551
1990	FLU	Dysphonia	11.5169
1990	FLU	Dyspnoea	1.9019
1990	FLU	Dysuria	6.9101
1990	FLU	Ear pain	5.923
1990	FLU	Encephalitis	3.3169
1990	FLU	Eyelid ptosis	13.8202
1990	FLU	Face oedema	1.1168
1990	FLU	Facial palsy	13.8202
1990	FLU	Flatulence	4.6067
1990	FLU	Gait disturbance	2.2411
1990	FLU	Gastroenteritis	8.2921
1990	FLU	Gastrointestinal haemorrhage	6.9101
1990	FLU	Glomerulonephritis	13.8202
1990	FLU	Guillain-Barre syndrome	19.0028
1990	FLU	Haematuria	1.9743
1990	FLU	Hallucination	6.9101
1990	FLU	Headache	2.0085
1990	FLU	Herpes zoster	8.6376
1990	FLU	Hyperaesthesia	3.4551
1990	FLU	Hyperglycaemia	6.9101
1990	FLU	Hyperhidrosis	2.2356
1990	FLU	Hypertension	4.0648
1990	FLU	Hyperventilation	1.1517
1990	FLU	Hypoaesthesia	2.3034
1990	FLU	Hypoglycaemia	27.6404
1990	FLU	Hyporeflexia	9.2135
1990	FLU	Hypotension	1.4548
1990	FLU	Hypoventilation	1.5356
1990	FLU	Hypoxia	27.6404
1990	FLU	Influenza	2.9235
1990	FLU	Injection site hypersensitivity	1.3024
1990	FLU	Injection site mass	1.3232
1990	FLU	Injection site oedema	1.4612
1990	FLU	Injection site pain	1.4065
1990	FLU	Laboratory test abnormal	1.043
1990	FLU	Lacrimal disorder	1.9743
1990	FLU	Laryngeal oedema	27.6404
1990	FLU	Laryngospasm	1.7275
1990	FLU	Leukopenia	1.382
1990	FLU	Lung disorder	1.9743
1990	FLU	Malaise	1.3401
1990	FLU	Mouth ulceration	3.4551
1990	FLU	Movement disorder	3.4551
1990	FLU	Multiple sclerosis	1.382
1990	FLU	Muscle atrophy	3.4551
1990	FLU	Myalgia	2.7161
1990	FLU	Myasthenic syndrome	6.2819
1990	FLU	Myelitis	4.6067
1990	FLU	Myocardial infarction	13.8202
1990	FLU	Nausea	1.5968
1990	FLU	Neck pain	3.0712
1990	FLU	Neuritis	1.9743
1990	FLU	Neuropathy	4.289
1990	FLU	Neuropathy peripheral	6.9101
1990	FLU	Nuchal rigidity	1.1762
1990	FLU	Oedema	1.382
1990	FLU	Pain	2.1166
1990	FLU	Palpitations	2.764
1990	FLU	Paraesthesia	4.5677
1990	FLU	Paralysis	6.2819
1990	FLU	Parosmia	13.8202
1990	FLU	Pericarditis	5.5281
1990	FLU	Pharyngitis	2.5712
1990	FLU	Photophobia	1.382
1990	FLU	Pleural disorder	6.9101
1990	FLU	Pleural effusion	27.6404
1990	FLU	Pneumonia	2.764
1990	FLU	Pollakiuria	6.9101
1990	FLU	Productive cough	4.6067
1990	FLU	Pruritus	1.1315
1990	FLU	Pseudo lymphoma	13.8202
1990	FLU	Quadriplegia	13.8202
1990	FLU	Red blood cell sedimentation rate increased	2.1821
1990	FLU	Respiratory disorder	9.2135
1990	FLU	Rheumatoid arthritis	1.2564
1990	FLU	Rhinitis	3.1096
1990	FLU	Right ventricular failure	27.6404
1990	FLU	Sepsis	1.7275
1990	FLU	Sinusitis	1.5356
1990	FLU	Skin nodule	1.382
1990	FLU	Speech disorder	2.5593
1990	FLU	Splenomegaly	6.9101
1990	FLU	Stevens-Johnson syndrome	13.8202
1990	FLU	Stomatitis	9.2135
1990	FLU	Synovitis	3.4551
1990	FLU	Tenosynovitis	5.5281
1990	FLU	Thinking abnormal	5.1826
1990	FLU	Thrombocytopenia	1.382
1990	FLU	Thrombosis	6.9101
1990	FLU	Tinnitus	1.1517
1990	FLU	Urinary incontinence	9.2135
1990	FLU	Vasculitis	27.6404
1990	FLU	Vasodilatation	1.1517
1990	FLU	Vertigo	2.4389
1990	FLU	Vestibular disorder	3.4551
1990	FLU	Visual disturbance	2.5128
1990	FLU	Visual field defect	2.3034
1990	HBPV	Face oedema	40.4316
1990	HBPV	Hypersensitivity	112.783
1990	HBPV	Oedema	20.6046
1990	HBPV	Sudden infant death syndrome	58.7089
1990	HEP	Abdominal pain	8.1755
1990	HEP	Abnormal faeces	11.8916
1990	HEP	Ageusia	2.9729
1990	HEP	Alanine aminotransferase increased	8.3241
1990	HEP	Amblyopia	8.9187
1990	HEP	Amenorrhoea	2.9729
1990	HEP	Amnesia	2.4774
1990	HEP	Anaemia	2.9729
1990	HEP	Angina pectoris	2.9729
1990	HEP	Angioneurotic oedema	5.2026
1990	HEP	Anxiety	1.9819
1990	HEP	Aphasia	2.9729
1990	HEP	Arthralgia	2.4864
1990	HEP	Arthropathy	8.9187
1990	HEP	Aspartate aminotransferase increased	9.6619
1990	HEP	Asthenia	2.2181
1990	HEP	Back pain	2.2297
1990	HEP	Blood amylase increased	1.4864
1990	HEP	Blood lactate dehydrogenase increased	5.9458
1990	HEP	Bone disorder	5.9458
1990	HEP	Bursitis	5.9458
1990	HEP	Central nervous system neoplasm	2.9729
1990	HEP	Chest pain	3.998
1990	HEP	Chills	1.8505
1990	HEP	Condition aggravated	7.1349
1990	HEP	Confusional state	2.2297
1990	HEP	Constipation	2.9729
1990	HEP	Depression	1.8581
1990	HEP	Dermatitis bullous	4.162
1990	HEP	Diarrhoea	2.2887
1990	HEP	Diplopia	2.9729
1990	HEP	Dizziness	3.4448
1990	HEP	Drug ineffective	20.8527
1990	HEP	Dry mouth	2.9729
1990	HEP	Dry skin	1.9819
1990	HEP	Dysgeusia	8.9187
1990	HEP	Dyspepsia	6.9367
1990	HEP	Dysphagia	1.6723
1990	HEP	Dysphonia	1.6988
1990	HEP	Dyspnoea	1.4685
1990	HEP	Dysuria	2.3783
1990	HEP	Ear pain	1.9819
1990	HEP	Ecchymosis	1.034
1990	HEP	Eczema	1.4864
1990	HEP	Enzyme abnormality	5.9458
1990	HEP	Eosinophilia	1.4864
1990	HEP	Eye pain	11.8916
1990	HEP	Face oedema	1.705
1990	HEP	Facial palsy	1.2741
1990	HEP	Fibromyalgia	2.9729
1990	HEP	Gastritis	2.9729
1990	HEP	Gastrointestinal haemorrhage	1.4864
1990	HEP	Gingivitis	2.9729
1990	HEP	Haematuria	2.9729
1990	HEP	Haemolytic anaemia	2.9729
1990	HEP	Headache	3.2551
1990	HEP	Hepatic function abnormal	20.8102
1990	HEP	Hepatitis	21.8012
1990	HEP	Herpes simplex	8.9187
1990	HEP	Herpes zoster	3.4684
1990	HEP	Hyperaesthesia	1.9819
1990	HEP	Hyperhidrosis	2.0241
1990	HEP	Hypersensitivity	2.2972
1990	HEP	Hypertension	1.3873
1990	HEP	Hyperventilation	1.3213
1990	HEP	Hypoaesthesia	2.2297
1990	HEP	Infection	1.0034
1990	HEP	Influenza	4.2307
1990	HEP	Injection site necrosis	1.4864
1990	HEP	Injection site pain	1.6249
1990	HEP	Jaundice	8.9187
1990	HEP	Keratitis	2.9729
1990	HEP	Laryngeal oedema	1.4864
1990	HEP	Laryngospasm	5.9458
1990	HEP	Leukopenia	1.1148
1990	HEP	Malaise	2.5745
1990	HEP	Menstrual disorder	2.9729
1990	HEP	Migraine	9.9096
1990	HEP	Mouth ulceration	1.9819
1990	HEP	Movement disorder	1.0811
1990	HEP	Multiple sclerosis	5.2026
1990	HEP	Muscle haemorrhage	2.9729
1990	HEP	Myalgia	2.8327
1990	HEP	Myasthenic syndrome	1.9478
1990	HEP	Myelitis	8.9187
1990	HEP	Myocardial infarction	2.9729
1990	HEP	Myositis	5.9458
1990	HEP	Nausea	6.9367
1990	HEP	Neck pain	4.8133
1990	HEP	Nervousness	2.5482
1990	HEP	Neuralgia	8.9187
1990	HEP	Neuritis	1.7837
1990	HEP	Nuchal rigidity	4.247
1990	HEP	Oedema peripheral	2.3122
1990	HEP	Oral candidiasis	8.9187
1990	HEP	Orthostatic hypotension	2.9729
1990	HEP	Osteoarthritis	1.1711
1990	HEP	Pain	1.4864
1990	HEP	Palpitations	4.162
1990	HEP	Pancreatitis	2.9729
1990	HEP	Paraesthesia	2.7191
1990	HEP	Parosmia	2.9729
1990	HEP	Pelvic pain	1.4864
1990	HEP	Pharyngitis	1.1621
1990	HEP	Photophobia	1.1148
1990	HEP	Photosensitivity reaction	2.9729
1990	HEP	Pleural disorder	1.4864
1990	HEP	Pollakiuria	1.4864
1990	HEP	Polyuria	2.9729
1990	HEP	Pruritus	3.9019
1990	HEP	Pseudo lymphoma	2.9729
1990	HEP	Pyelonephritis	2.9729
1990	HEP	Red blood cell sedimentation rate increased	2.4774
1990	HEP	Renal impairment	4.4593
1990	HEP	Rhinitis	1.0735
1990	HEP	Right ventricular failure	1.4864
1990	HEP	Salivary gland enlargement	2.9729
1990	HEP	Serum sickness	1.1892
1990	HEP	Similar reaction on previous exposure to drug	5.9458
1990	HEP	Sinusitis	4.4593
1990	HEP	Skin disorder	2.2297
1990	HEP	Splenomegaly	5.9458
1990	HEP	Synovitis	1.9819
1990	HEP	Tachycardia	1.6351
1990	HEP	Tenosynovitis	1.1892
1990	HEP	Thirst	5.9458
1990	HEP	Thrombocytopenia	1.6988
1990	HEP	Tinnitus	9.9096
1990	HEP	Tongue disorder	2.9729
1990	HEP	Tongue oedema	7.4322
1990	HEP	Unevaluable event	9.4495
1990	HEP	Urinary tract infection	2.9729
1990	HEP	Urine analysis abnormal	5.9458
1990	HEP	Urticaria	1.4629
1990	HEP	Vertigo	6.9367
1990	HEP	Vestibular disorder	1.9819
1990	HEP	Visual disturbance	2.5482
1990	HEP	Visual field defect	2.2297
1990	HEP	Weight decreased	5.9458
1990	HEP	White blood cell disorder	1.4864
1990	HEPAB	Immediate post-injection reaction	8572.5
1990	HEPAB	Pruritus	46.5897
1990	HIBV	Abasia	7.1823
1990	HIBV	Abdominal distension	4.7882
1990	HIBV	Acidosis	3.5912
1990	HIBV	Agitation	2.0182
1990	HIBV	Anorexia	2.2681
1990	HIBV	Antinuclear antibody	1.7956
1990	HIBV	Aplastic anaemia	4.7882
1990	HIBV	Apnoea	2.7103
1990	HIBV	Arrhythmia	4.7882
1990	HIBV	Autism	3.1922
1990	HIBV	Blindness	2.3941
1990	HIBV	Brain oedema	14.3647
1990	HIBV	Bronchiolitis	5.3868
1990	HIBV	Bronchitis	1.105
1990	HIBV	Cardiac arrest	4.7882
1990	HIBV	Cardiac failure	2.8729
1990	HIBV	Cellulitis	1.7412
1990	HIBV	Coagulopathy	6.1563
1990	HIBV	Condition aggravated	1.9153
1990	HIBV	Confusional state	1.5121
1990	HIBV	Conjunctivitis	1.9951
1990	HIBV	Convulsion	2.0624
1990	HIBV	Coordination abnormal	1.2491
1990	HIBV	Crying	1.6206
1990	HIBV	CSF test abnormal	5.1302
1990	HIBV	Cyanosis	2.1281
1990	HIBV	Dementia	4.7882
1990	HIBV	Ear disorder	1.5961
1990	HIBV	Ecchymosis	2.1281
1990	HIBV	Electroencephalogram abnormal	4.1042
1990	HIBV	Encephalitis	1.5391
1990	HIBV	Erythema multiforme	6.1563
1990	HIBV	Eye disorder	1.69
1990	HIBV	Febrile convulsion	3.9387
1990	HIBV	Gait disturbance	1.4733
1990	HIBV	Gaze palsy	2.5936
1990	HIBV	Gingival bleeding	4.7882
1990	HIBV	Gingivitis	14.3647
1990	HIBV	Grand mal convulsion	2.6934
1990	HIBV	Haematuria	2.0521
1990	HIBV	Haemorrhage	1.105
1990	HIBV	Hyperacusis	3.5912
1990	HIBV	Hyperkinesia	7.1823
1990	HIBV	Hypertonia	1.0562
1990	HIBV	Hyperventilation	1.1971
1990	HIBV	Hypochromic anaemia	7.1823
1990	HIBV	Hyporeflexia	1.026
1990	HIBV	Hypotension	1.105
1990	HIBV	Hypothermia	3.5912
1990	HIBV	Hypotonia	1.4503
1990	HIBV	Immunoglobulins decreased	3.5912
1990	HIBV	Infection	1.646
1990	HIBV	Injection site atrophy	2.8729
1990	HIBV	Insomnia	1.0641
1990	HIBV	Leukocytosis	1.7956
1990	HIBV	Meningitis	5.3868
1990	HIBV	Mental retardation severity unspecified	2.3941
1990	HIBV	Muscle spasms	1.4365
1990	HIBV	Muscle twitching	2.5349
1990	HIBV	Myoclonus	3.5912
1990	HIBV	Oedema peripheral	1.486
1990	HIBV	Osteoarthritis	1.3681
1990	HIBV	Otitis media	2.0258
1990	HIBV	Pallor	2.1079
1990	HIBV	Pericarditis	2.3941
1990	HIBV	Personality disorder	3.1922
1990	HIBV	Pneumonia	3.4673
1990	HIBV	Pulmonary oedema	3.5912
1990	HIBV	Purpura	3.5912
1990	HIBV	Pyelonephritis	4.7882
1990	HIBV	Pyrexia	1.4985
1990	HIBV	Rash	1.3129
1990	HIBV	Rash maculo-papular	1.4365
1990	HIBV	Respiratory disorder	2.21
1990	HIBV	Rheumatoid arthritis	1.3059
1990	HIBV	Rhinitis	1.105
1990	HIBV	Salivary hypersecretion	2.6118
1990	HIBV	Screaming	1.0505
1990	HIBV	Sepsis	4.1042
1990	HIBV	Shock	2.5349
1990	HIBV	Skin discolouration	1.69
1990	HIBV	Skin disorder	5.7459
1990	HIBV	Skin ulcer	3.5912
1990	HIBV	Somnolence	1.789
1990	HIBV	Speech disorder	1.486
1990	HIBV	Stupor	1.3936
1990	HIBV	Sudden infant death syndrome	1.989
1990	HIBV	Tachycardia	2.7624
1990	HIBV	Thinking abnormal	1.4365
1990	HIBV	Tremor	1.0426
1990	HIBV	Urinary tract infection	1.5961
1990	HIBV	Urine analysis abnormal	1.3059
1990	HIBV	Urticaria	1.4589
1990	HIBV	Visual disturbance	1.1971
1990	HIBV	Vomiting	1.6661
1990	IPV	Agitation	1.9432
1990	IPV	Bronchitis	82.3606
1990	IPV	Convulsion	2.3635
1990	IPV	Diarrhoea	4.8229
1990	IPV	Malaise	5.9483
1990	IPV	Pain	2.7955
1990	IPV	Paralysis	34.5383
1990	IPV	Pneumonia	30.5911
1990	IPV	Pyrexia	1.6338
1990	IPV	Rash	1.761
1990	IPV	Rhinitis	11.038
1990	IPV	Syncope	14.667
1990	IPV	Vomiting	6.0491
1990	MEA	Abnormal labour	77.6301
1990	MEA	Abortion	14.5557
1990	MEA	Albuminuria	58.2226
1990	MEA	Amenorrhoea	116.445
1990	MEA	Amnesia	11.6445
1990	MEA	Apnoea	1.8781
1990	MEA	Arthralgia	1.5578
1990	MEA	Arthritis	1.8483
1990	MEA	Asthenia	1.3987
1990	MEA	Blood lactate dehydrogenase increased	23.289
1990	MEA	Bradycardia	9.7038
1990	MEA	Bronchitis	8.9573
1990	MEA	Cardiac arrest	4.3128
1990	MEA	Cardiac failure	58.2226
1990	MEA	Chest pain	1.738
1990	MEA	Coagulopathy	12.9384
1990	MEA	Conjunctivitis	2.9111
1990	MEA	Cough	1.1416
1990	MEA	Dehydration	6.8497
1990	MEA	Dysphagia	4.8519
1990	MEA	Dyspnoea	1.9089
1990	MEA	Electroencephalogram abnormal	14.5557
1990	MEA	Face oedema	2.218
1990	MEA	Foetal disorder	29.1113
1990	MEA	Grand mal convulsion	3.1472
1990	MEA	Guillain-Barre syndrome	2.0794
1990	MEA	Headache	1.065
1990	MEA	Hypertension	5.545
1990	MEA	Hypertonia	1.6173
1990	MEA	Hypokinesia	1.2657
1990	MEA	Infection	3.359
1990	MEA	Injection site mass	1.1416
1990	MEA	Insomnia	2.0429
1990	MEA	Lacrimal disorder	16.635
1990	MEA	Lymphadenopathy	4.0154
1990	MEA	Malaise	1.9626
1990	MEA	Myalgia	2.2945
1990	MEA	Myocarditis	58.2226
1990	MEA	Myoclonus	12.9384
1990	MEA	Nausea	1.2611
1990	MEA	Neuropathy peripheral	23.289
1990	MEA	Nuchal rigidity	2.3289
1990	MEA	Oedema peripheral	3.7563
1990	MEA	Palpitations	10.5859
1990	MEA	Pharyngitis	1.5423
1990	MEA	Photophobia	25.8767
1990	MEA	Pneumonia	3.327
1990	MEA	Pruritus	2.5734
1990	MEA	Pyrexia	1.2553
1990	MEA	Rash	1.944
1990	MEA	Rash maculo-papular	3.2648
1990	MEA	Renal failure	29.1113
1990	MEA	Rhinitis	3.6772
1990	MEA	Sepsis	4.4787
1990	MEA	Serum sickness	3.4249
1990	MEA	Shock	6.1287
1990	MEA	Thinking abnormal	11.6445
1990	MEA	Visual field defect	19.4075
1990	MEN	Amnesia	59.0276
1990	MEN	Arthralgia	1.9546
1990	MEN	Asthenia	5.3019
1990	MEN	Guillain-Barre syndrome	10.5406
1990	MEN	Headache	3.5883
1990	MEN	Hypokinesia	12.9731
1990	MEN	Injection site hypersensitivity	2.8379
1990	MEN	Injection site reaction	1.2196
1990	MEN	Laboratory test abnormal	21.4646
1990	MEN	Lymphadenopathy	7.9767
1990	MEN	Malaise	3.2793
1990	MEN	Muscle spasms	28.1084
1990	MEN	Myalgia	2.8654
1990	MEN	Neuropathy	15.9534
1990	MEN	Pain	3.0904
1990	MEN	Paraesthesia	3.7838
1990	MEN	Pharyngitis	7.8182
1990	MEN	Urticaria	2.1006
1990	MER	Antinuclear antibody	36.2034
1990	MER	Arthralgia	3.8746
1990	MER	Asthenia	2.6014
1990	MER	Blindness	115.851
1990	MER	Conjunctivitis	7.2407
1990	MER	Cough	2.8395
1990	MER	Drug ineffective	1.0362
1990	MER	Eosinophilia	144.814
1990	MER	Foetal disorder	193.085
1990	MER	Guillain-Barre syndrome	5.1719
1990	MER	Headache	1.7607
1990	MER	Hypertension	13.7918
1990	MER	Hypokinesia	3.1481
1990	MER	Infection	2.7323
1990	MER	Keratitis	289.627
1990	MER	Laboratory test abnormal	5.1719
1990	MER	Lymphadenopathy	1.9438
1990	MER	Malaise	3.2361
1990	MER	Multiple sclerosis	28.9627
1990	MER	Myalgia	2.8256
1990	MER	Optic neuritis	193.085
1990	MER	Otitis media	3.2912
1990	MER	Paraesthesia	1.8566
1990	MER	Petechiae	11.5851
1990	MER	Pharyngitis	3.8361
1990	MER	Pneumonia	8.2751
1990	MER	Pruritus	1.5741
1990	MER	Rash	1.4338
1990	MER	Rash maculo-papular	2.6571
1990	MER	Red blood cell sedimentation rate increased	13.7918
1990	MER	Sialoadenitis	32.1808
1990	MER	Skin nodule	28.9627
1990	MER	Syncope	3.9675
1990	MER	Tendon disorder	96.5424
1990	MER	Urticaria	1.0307
1990	MER	Vestibular disorder	72.4068
1990	MER	Visual disturbance	24.1356
1990	MMR	Abdominal distension	2.6023
1990	MMR	Abnormal behaviour	15.6138
1990	MMR	Abnormal labour	5.2046
1990	MMR	Abortion	15.6138
1990	MMR	Abscess	2.6023
1990	MMR	Albuminuria	3.9034
1990	MMR	Anaemia	1.5614
1990	MMR	Anaphylactoid reaction	1.8369
1990	MMR	Antibody test negative	7.8069
1990	MMR	Antinuclear antibody	6.2455
1990	MMR	Anxiety	1.9517
1990	MMR	Aphasia	7.8069
1990	MMR	Aplastic anaemia	7.8069
1990	MMR	Arrhythmia	2.6023
1990	MMR	Arthralgia	1.4695
1990	MMR	Arthritis	2.6023
1990	MMR	Arthropathy	2.6023
1990	MMR	Aspartate aminotransferase increased	1.0409
1990	MMR	Asthma	2.4109
1990	MMR	Autism	6.5057
1990	MMR	Back pain	1.3011
1990	MMR	Blood amylase increased	15.6138
1990	MMR	Blood creatine phosphokinase increased	2.6023
1990	MMR	Blood lactate dehydrogenase increased	1.5614
1990	MMR	Bradycardia	1.4194
1990	MMR	Bronchiolitis	1.7349
1990	MMR	Cardiac failure	1.5614
1990	MMR	Coma	1.0409
1990	MMR	Condition aggravated	1.6729
1990	MMR	Confusional state	1.3011
1990	MMR	Conjunctivitis	6.1097
1990	MMR	Constipation	7.8069
1990	MMR	Convulsion	1.4472
1990	MMR	Coordination abnormal	3.6738
1990	MMR	Cough	1.8812
1990	MMR	CSF test abnormal	2.0818
1990	MMR	Deafness	11.7103
1990	MMR	Death	7.8069
1990	MMR	Dehydration	1.5614
1990	MMR	Delirium	1.1153
1990	MMR	Dementia	2.6023
1990	MMR	Dizziness	1.0409
1990	MMR	Drug toxicity	7.8069
1990	MMR	Dry skin	1.9517
1990	MMR	Dyspnoea	1.2403
1990	MMR	Ear pain	1.9517
1990	MMR	Ecchymosis	3.1937
1990	MMR	Eczema	3.9034
1990	MMR	Encephalitis	2.7154
1990	MMR	Enzyme abnormality	3.9034
1990	MMR	Eye disorder	2.7882
1990	MMR	Eye pain	1.9517
1990	MMR	Face oedema	1.9063
1990	MMR	Febrile convulsion	1.5377
1990	MMR	Flatulence	2.6023
1990	MMR	Foetal disorder	5.2046
1990	MMR	Gait disturbance	1.266
1990	MMR	Gastroenteritis	1.1153
1990	MMR	Gastrointestinal disorder	1.5614
1990	MMR	Gastrointestinal haemorrhage	3.9034
1990	MMR	Gaze palsy	1.4096
1990	MMR	Gingival bleeding	7.8069
1990	MMR	Glomerulonephritis	7.8069
1990	MMR	Grand mal convulsion	1.1829
1990	MMR	Haemorrhage	2.1291
1990	MMR	Hemiplegia	3.9034
1990	MMR	Hepatitis	1.0646
1990	MMR	Herpes simplex	2.6023
1990	MMR	Hyperacusis	11.7103
1990	MMR	Hyperglycaemia	15.6138
1990	MMR	Hyperhidrosis	1.0037
1990	MMR	Hyperkinesia	1.5614
1990	MMR	Hypersensitivity	1.4194
1990	MMR	Hypertension	1.2327
1990	MMR	Hypotension	1.3011
1990	MMR	Immunoglobulins decreased	5.2046
1990	MMR	Infection	2.0206
1990	MMR	Injection site atrophy	1.5614
1990	MMR	Injection site necrosis	3.9034
1990	MMR	Injury	2.6023
1990	MMR	Laboratory test abnormal	1.8669
1990	MMR	Lacrimal disorder	1.1153
1990	MMR	Laryngospasm	2.2305
1990	MMR	Lethargy	3.9034
1990	MMR	Leukocytosis	1.2592
1990	MMR	Leukopenia	2.9276
1990	MMR	Lung disorder	1.8016
1990	MMR	Lymphadenopathy	2.6488
1990	MMR	Menstrual disorder	7.8069
1990	MMR	Mental retardation severity unspecified	1.9517
1990	MMR	Migraine	1.4194
1990	MMR	Mouth ulceration	5.2046
1990	MMR	Muscle twitching	1.9517
1990	MMR	Musculoskeletal stiffness	3.9034
1990	MMR	Myoclonus	1.9517
1990	MMR	Myositis	3.9034
1990	MMR	Nervous system disorder	2.6023
1990	MMR	Neuralgia	2.6023
1990	MMR	Neuropathy peripheral	1.5614
1990	MMR	Orchitis	39.0344
1990	MMR	Osteoarthritis	3.7775
1990	MMR	Otitis media	1.9792
1990	MMR	Pain	1.4457
1990	MMR	Pancreatitis	2.6023
1990	MMR	Pelvic pain	3.9034
1990	MMR	Pericarditis	1.3011
1990	MMR	Personality disorder	6.5057
1990	MMR	Petechiae	3.4697
1990	MMR	Pharyngitis	1.6729
1990	MMR	Photophobia	4.4611
1990	MMR	Photosensitivity reaction	7.8069
1990	MMR	Productive cough	2.6023
1990	MMR	Pulse absent	7.8069
1990	MMR	Purpura	1.9517
1990	MMR	Pyrexia	1.2035
1990	MMR	Rash	2.0981
1990	MMR	Rash maculo-papular	4.2883
1990	MMR	Red blood cell sedimentation rate increased	1.2327
1990	MMR	Renal impairment	1.9517
1990	MMR	Respiratory arrest	7.8069
1990	MMR	Respiratory tract congestion	7.8069
1990	MMR	Resuscitation	7.8069
1990	MMR	Rheumatoid arthritis	3.9034
1990	MMR	Rhinitis	2.0018
1990	MMR	Salivary gland enlargement	7.8069
1990	MMR	Salivary hypersecretion	2.3421
1990	MMR	Sialoadenitis	70.2619
1990	MMR	Skin ulcer	1.9517
1990	MMR	Speech disorder	3.0549
1990	MMR	Stevens-Johnson syndrome	7.8069
1990	MMR	Stomatitis	1.9517
1990	MMR	Subcutaneous nodule	7.8069
1990	MMR	Supraventricular tachycardia	1.9517
1990	MMR	Syncope	3.0933
1990	MMR	Synovitis	1.9517
1990	MMR	Tenosynovitis	3.1228
1990	MMR	Tetany	3.9034
1990	MMR	Thirst	3.9034
1990	MMR	Thrombocytopenia	1.7349
1990	MMR	Thrombocytopenic purpura	13.0115
1990	MMR	Tremor	1.0676
1990	MMR	Urinary incontinence	1.9517
1990	MMR	Urinary retention	3.9034
1990	MMR	Vascular anomaly	3.9034
1990	MMR	Vasculitis	1.5614
1990	MMR	Vestibular disorder	1.9517
1990	MMR	Visual field defect	1.3011
1990	MMR	Weight decreased	3.9034
1990	MMR	White blood cell disorder	7.8069
1990	MU	Asthenia	7.2874
1990	MU	Guillain-Barre syndrome	43.7245
1990	MU	Hypokinesia	26.6149
1990	MU	Laboratory test abnormal	43.7245
1990	MU	Pharyngitis	16.109
1990	MUR	Unevaluable event	73.588
1990	OPV	Abasia	2.9894
1990	OPV	Abdominal distension	1.9929
1990	OPV	Abnormal dreams	5.9788
1990	OPV	Acidosis	3.9859
1990	OPV	Adrenal cortex necrosis	5.9788
1990	OPV	Adrenal haemorrhage	5.9788
1990	OPV	Affect lability	1.1958
1990	OPV	Agitation	2.4835
1990	OPV	Anorexia	1.6834
1990	OPV	Apnoea	2.2996
1990	OPV	Apraxia	5.9788
1990	OPV	Arrhythmia	1.9929
1990	OPV	Asthma	1.5158
1990	OPV	Blood creatine phosphokinase increased	1.9929
1990	OPV	Bradycardia	1.0871
1990	OPV	Bronchiolitis	2.2421
1990	OPV	Cardiac arrest	1.6306
1990	OPV	Cardiovascular disorder	5.9788
1990	OPV	Cerebral infarction	1.9929
1990	OPV	Coagulopathy	2.5624
1990	OPV	Coma	3.2612
1990	OPV	Convulsion	2.0282
1990	OPV	Crying	3.6316
1990	OPV	Cyanosis	2.5427
1990	OPV	Dehydration	1.1958
1990	OPV	Delirium	3.5873
1990	OPV	Depressed level of consciousness	5.9788
1990	OPV	Drooling	5.9788
1990	OPV	Dry skin	1.4947
1990	OPV	Ear disorder	1.4947
1990	OPV	Electroencephalogram abnormal	1.7082
1990	OPV	Encephalitis	1.1498
1990	OPV	Encephalopathy	3.4165
1990	OPV	Endocrine disorder	5.9788
1990	OPV	Erythema	1.9929
1990	OPV	Erythema multiforme	1.4947
1990	OPV	Eye disorder	1.5944
1990	OPV	Febrile convulsion	1.7642
1990	OPV	Flatulence	1.9929
1990	OPV	Gastrointestinal disorder	2.9894
1990	OPV	Gaze palsy	2.4912
1990	OPV	Globulins decreased	5.9788
1990	OPV	Grand mal convulsion	2.4358
1990	OPV	Haemorrhage	1.6306
1990	OPV	Hallucination	1.1958
1990	OPV	Hemiplegia	1.1958
1990	OPV	Hydrocephalus	5.9788
1990	OPV	Hydronephrosis	5.9788
1990	OPV	Hyperaesthesia	1.4947
1990	OPV	Hyperkinesia	2.9894
1990	OPV	Hypertonia	1.5463
1990	OPV	Hypochromic anaemia	1.1958
1990	OPV	Hypokinesia	1.5351
1990	OPV	Hyponatraemia	5.9788
1990	OPV	Hypotonia	2.6867
1990	OPV	Hypoventilation	2.5624
1990	OPV	Immune system disorder	3.5873
1990	OPV	Immunoglobulins decreased	1.4947
1990	OPV	Injection site abscess	1.1572
1990	OPV	Injection site atrophy	1.1958
1990	OPV	Injection site inflammation	1.3286
1990	OPV	Injection site reaction	1.4755
1990	OPV	Injury	1.9929
1990	OPV	Insomnia	1.9024
1990	OPV	Intracranial pressure increased	1.9929
1990	OPV	Lethargy	2.9894
1990	OPV	Leukoplakia oral	5.9788
1990	OPV	Lung disorder	1.3797
1990	OPV	Meningitis	1.9132
1990	OPV	Mental retardation severity unspecified	2.0696
1990	OPV	Muscle atrophy	3.9859
1990	OPV	Muscle spasms	2.7901
1990	OPV	Muscle twitching	1.0551
1990	OPV	Mydriasis	5.9788
1990	OPV	Myocarditis	2.9894
1990	OPV	Neoplasm	2.9894
1990	OPV	Nervous system disorder	1.9929
1990	OPV	Nervousness	1.0871
1990	OPV	Neurodevelopmental disorder	5.9788
1990	OPV	Nystagmus	1.9929
1990	OPV	Opisthotonus	5.9788
1990	OPV	Optic neuritis	1.4947
1990	OPV	Otitis media	2.2076
1990	OPV	Pallor	2.4314
1990	OPV	Paralysis flaccid	5.9788
1990	OPV	Pelvic pain	1.1958
1990	OPV	Peripheral vascular disorder	3.9859
1990	OPV	Poliomyelitis	5.9788
1990	OPV	Productive cough	1.9929
1990	OPV	Pulmonary oedema	1.4947
1990	OPV	Purpura	1.4947
1990	OPV	Pyrexia	1.5195
1990	OPV	Renal failure	1.4947
1990	OPV	Restlessness	5.9788
1990	OPV	Salivary hypersecretion	2.6573
1990	OPV	Screaming	3.0251
1990	OPV	Sepsis	1.3588
1990	OPV	Shock	2.5624
1990	OPV	Skin discolouration	1.121
1990	OPV	Sleep disorder	5.9788
1990	OPV	Somnolence	2.1429
1990	OPV	Staring	5.9788
1990	OPV	Stupor	2.5541
1990	OPV	Subarachnoid haemorrhage	5.9788
1990	OPV	Subcutaneous nodule	1.9929
1990	OPV	Subdural haematoma	5.9788
1990	OPV	Sudden infant death syndrome	3.6393
1990	OPV	Supraventricular tachycardia	3.9859
1990	OPV	Tetany	2.9894
1990	OPV	Thinking abnormal	1.3286
1990	OPV	Tremor	1.8943
1990	OPV	Urinary retention	2.9894
1990	OPV	Vascular anomaly	2.9894
1990	OPV	Ventricular fibrillation	5.9788
1990	OPV	Vomiting	1.2608
1990	OPV	Weight increased	5.9788
1990	PLAGUE	Amnesia	155.782
1990	PLAGUE	Arthralgia	5.1583
1990	PLAGUE	Depression	129.818
1990	PLAGUE	Fatigue	1557.82
1990	PLAGUE	Hypoaesthesia	259.636
1990	PLAGUE	Myalgia	7.5622
1990	PLAGUE	Rash	2.5622
1990	PPV	Anaphylactoid reaction	2.0309
1990	PPV	Angioneurotic oedema	9.0264
1990	PPV	Antinuclear antibody	5.0774
1990	PPV	Arthralgia	1.3863
1990	PPV	Arthritis	3.4423
1990	PPV	Asthma	1.4169
1990	PPV	Bone disorder	20.3095
1990	PPV	Cellulitis	4.9235
1990	PPV	Cerebral infarction	13.5396
1990	PPV	Chest pain	2.5387
1990	PPV	Chills	3.3158
1990	PPV	Cough	2.5125
1990	PPV	Dehydration	2.3893
1990	PPV	Dizziness	1.2309
1990	PPV	Dysuria	5.0774
1990	PPV	Encephalopathy	1.9342
1990	PPV	Eosinophilia	20.3095
1990	PPV	Facial palsy	4.5132
1990	PPV	Gait disturbance	1.9814
1990	PPV	Hallucination	8.1238
1990	PPV	Headache	1.6605
1990	PPV	Herpes zoster	3.3849
1990	PPV	Hyperhidrosis	1.055
1990	PPV	Hypersensitivity	1.0689
1990	PPV	Hypokinesia	2.8013
1990	PPV	Hypoxia	20.3095
1990	PPV	Injection site abscess	1.1283
1990	PPV	Injection site hypersensitivity	2.6941
1990	PPV	Injection site mass	1.6412
1990	PPV	Injection site oedema	3.5168
1990	PPV	Injection site pain	3.9366
1990	PPV	Injection site reaction	2.4887
1990	PPV	Lung disorder	2.7079
1990	PPV	Lymphadenopathy	2.2884
1990	PPV	Lymphangitis	40.6189
1990	PPV	Malaise	1.1539
1990	PPV	Movement disorder	6.2491
1990	PPV	Myalgia	2.0619
1990	PPV	Nausea	1.0415
1990	PPV	Neck pain	2.3434
1990	PPV	Neuritis	13.5396
1990	PPV	Neuropathy	2.2566
1990	PPV	Nuchal rigidity	1.6579
1990	PPV	Oedema	2.9162
1990	PPV	Oedema peripheral	1.3103
1990	PPV	Oral candidiasis	13.5396
1990	PPV	Pain	2.8286
1990	PPV	Paraesthesia	1.0619
1990	PPV	Paralysis	2.7079
1990	PPV	Pharyngitis	1.0904
1990	PPV	Pleural disorder	20.3095
1990	PPV	Pleural effusion	20.3095
1990	PPV	Pneumonia	8.1238
1990	PPV	Pneumothorax	40.6189
1990	PPV	Polyuria	40.6189
1990	PPV	Pruritus	1.1283
1990	PPV	Red blood cell sedimentation rate increased	6.4135
1990	PPV	Renal failure	10.1547
1990	PPV	Rheumatoid arthritis	3.6926
1990	PPV	Sepsis	7.0642
1990	PPV	Serum sickness	1.1947
1990	PPV	Sinusitis	4.5132
1990	PPV	Skin discolouration	2.2566
1990	PPV	Stomatitis	10.1547
1990	PPV	Tendon disorder	13.5396
1990	PPV	Vasodilatation	2.1956
1990	RAB	Abdominal pain	6.5153
1990	RAB	Acidosis	28.9116
1990	RAB	Amblyopia	6.0866
1990	RAB	Amnesia	11.5646
1990	RAB	Anaphylactoid reaction	5.7823
1990	RAB	Arthralgia	1.5471
1990	RAB	Asthenia	2.0963
1990	RAB	Asthma	1.3142
1990	RAB	Back pain	2.1027
1990	RAB	Cardiac arrest	4.2832
1990	RAB	Cardiac failure	23.1293
1990	RAB	Chills	1.4732
1990	RAB	Coma	7.2279
1990	RAB	Diarrhoea	1.577
1990	RAB	Dizziness	4.414
1990	RAB	Dysgeusia	38.5488
1990	RAB	Dyspepsia	12.8496
1990	RAB	Dysphagia	10.0562
1990	RAB	Dyspnoea	2.8673
1990	RAB	Eyelid ptosis	115.646
1990	RAB	Face oedema	1.091
1990	RAB	Headache	4.7277
1990	RAB	Hypersensitivity	3.0433
1990	RAB	Hyperventilation	9.6372
1990	RAB	Hypoventilation	12.8496
1990	RAB	Infection	1.091
1990	RAB	Influenza	1.8653
1990	RAB	Injury	38.5488
1990	RAB	Lymphadenopathy	3.1684
1990	RAB	Malaise	1.2921
1990	RAB	Muscle twitching	2.9653
1990	RAB	Myalgia	2.8625
1990	RAB	Myasthenic syndrome	2.4606
1990	RAB	Nausea	2.1027
1990	RAB	Neuropathy	3.1256
1990	RAB	Nuchal rigidity	2.3129
1990	RAB	Pain	1.5257
1990	RAB	Pancreatitis	38.5488
1990	RAB	Paraesthesia	2.2528
1990	RAB	Paralysis	3.7305
1990	RAB	Petechiae	4.6259
1990	RAB	Pruritus	4.5479
1990	RAB	Pulmonary oedema	28.9116
1990	RAB	Renal failure	28.9116
1990	RAB	Tongue disorder	115.646
1990	RAB	Urinary incontinence	28.9116
1990	RAB	Urticaria	3.3765
1990	RAB	Vasodilatation	1.5019
1990	RUB	Affect lability	20.711
1990	RUB	Amblyopia	5.4503
1990	RUB	Antibody test negative	103.555
1990	RUB	Antinuclear antibody	29.5871
1990	RUB	Arthralgia	4.6421
1990	RUB	Arthritis	10.7126
1990	RUB	Asthenia	3.1668
1990	RUB	Back pain	1.8828
1990	RUB	Blindness	17.2591
1990	RUB	Bradycardia	8.6296
1990	RUB	Chest pain	1.5456
1990	RUB	Chills	1.3192
1990	RUB	Coordination abnormal	4.3148
1990	RUB	Cough	1.0152
1990	RUB	Deafness	15.9315
1990	RUB	Dehydration	6.0915
1990	RUB	Depression	8.6296
1990	RUB	Dizziness	1.5456
1990	RUB	Dyspnoea	1.6976
1990	RUB	Gait disturbance	5.0515
1990	RUB	Gastroenteritis	14.7936
1990	RUB	Grand mal convulsion	2.7988
1990	RUB	Guillain-Barre syndrome	3.7656
1990	RUB	Headache	1.5883
1990	RUB	Hypotension	2.5257
1990	RUB	Infection	1.9725
1990	RUB	Injection site atrophy	20.711
1990	RUB	Leukocytosis	2.9587
1990	RUB	Lymphadenopathy	5.0691
1990	RUB	Malaise	2.9419
1990	RUB	Myalgia	3.0912
1990	RUB	Neuropathy	8.8761
1990	RUB	Osteoarthritis	9.8624
1990	RUB	Palpitations	9.4141
1990	RUB	Paraesthesia	3.4064
1990	RUB	Pharyngitis	4.965
1990	RUB	Rash	1.9049
1990	RUB	Rash maculo-papular	5.9743
1990	RUB	Red blood cell sedimentation rate increased	4.9312
1990	RUB	Rhinitis	2.1574
1990	RUB	Sinusitis	11.5061
1990	RUB	Skin discolouration	5.753
1990	RUB	Tachycardia	3.4518
1990	RUB	Tenosynovitis	17.2591
1990	RUB	Thrombocytopenia	10.3555
1990	RUB	Unevaluable event	1.3449
1990	RUB	Vasculitis	20.711
1990	RUB	Vertigo	11.5061
1990	RUB	Visual field defect	17.2591
1990	TD	Amblyopia	1.7344
1990	TD	Arthralgia	1.0088
1990	TD	Asthenia	1.0078
1990	TD	Back pain	1.8653
1990	TD	Bradycardia	5.9917
1990	TD	Bursitis	16.4772
1990	TD	Cellulitis	3.9945
1990	TD	Cerebrovascular accident	32.9545
1990	TD	Chest pain	2.6154
1990	TD	Chills	2.2117
1990	TD	Coordination abnormal	1.3731
1990	TD	CSF test abnormal	1.8308
1990	TD	Dermatitis bullous	2.9959
1990	TD	Dizziness	1.7882
1990	TD	Ear disorder	8.2386
1990	TD	Ecchymosis	3.5308
1990	TD	Eye disorder	1.8308
1990	TD	Face oedema	1.2798
1990	TD	Facial palsy	1.7344
1990	TD	Fibromyalgia	32.9545
1990	TD	Gait disturbance	1.6075
1990	TD	Guillain-Barre syndrome	1.8308
1990	TD	Headache	1.5643
1990	TD	Hyperhidrosis	1.7576
1990	TD	Hypertension	1.5693
1990	TD	Hyperventilation	2.7462
1990	TD	Hypoaesthesia	5.4924
1990	TD	Hypotension	2.535
1990	TD	Injection site abscess	3.9945
1990	TD	Injection site hypersensitivity	6.179
1990	TD	Injection site mass	5.6172
1990	TD	Injection site necrosis	16.4772
1990	TD	Injection site oedema	4.9885
1990	TD	Injection site pain	3.3538
1990	TD	Injection site reaction	2.7217
1990	TD	Lymphadenopathy	1.3731
1990	TD	Malaise	1.1299
1990	TD	Multiple sclerosis	3.2954
1990	TD	Myalgia	1.3248
1990	TD	Neck pain	1.9012
1990	TD	Neuritis	4.7078
1990	TD	Neuropathy peripheral	6.5909
1990	TD	Nystagmus	10.9848
1990	TD	Oedema	2.1858
1990	TD	Pain	2.4924
1990	TD	Paraesthesia	2.4829
1990	TD	Peripheral vascular disorder	8.2386
1990	TD	Pharyngitis	1.3451
1990	TD	Pruritus	1.4895
1990	TD	Rash	1.0612
1990	TD	Skin nodule	7.3232
1990	TD	Syncope	3.9945
1990	TD	Tachycardia	2.2727
1990	TD	Tendon disorder	10.9848
1990	TD	Thrombocytopenia	3.2954
1990	TD	Thrombosis	65.9089
1990	TD	Tremor	1.0218
1990	TD	Vasodilatation	4.6618
1990	TTOX	Abdominal pain	2.3509
1990	TTOX	Affect lability	34.7939
1990	TTOX	Asthma	1.9769
1990	TTOX	Cellulitis	9.9411
1990	TTOX	Dizziness	1.2887
1990	TTOX	Dry mouth	34.7939
1990	TTOX	Dysphagia	7.2487
1990	TTOX	Dyspnoea	2.852
1990	TTOX	Dysuria	21.7462
1990	TTOX	Ear pain	19.3299
1990	TTOX	Face oedema	5.0183
1990	TTOX	Hypoaesthesia	13.3823
1990	TTOX	Influenza	1.3918
1990	TTOX	Injection site abscess	9.9411
1990	TTOX	Injection site hypersensitivity	5.142
1990	TTOX	Injection site mass	7.0291
1990	TTOX	Injection site oedema	3.536
1990	TTOX	Injection site pain	2.1216
1990	TTOX	Injection site reaction	5.1711
1990	TTOX	Lymphadenopathy	1.1676
1990	TTOX	Movement disorder	12.4264
1990	TTOX	Neck pain	3.2217
1990	TTOX	Neuritis	24.8528
1990	TTOX	Nuchal rigidity	3.4794
1990	TTOX	Oedema	6.9242
1990	TTOX	Oedema peripheral	5.6119
1990	TTOX	Pain	1.8313
1990	TTOX	Paraesthesia	2.2448
1990	TTOX	Pharyngitis	2.3042
1990	TTOX	Pollakiuria	86.9847
1990	TTOX	Pruritus	2.8676
1990	TTOX	Skin nodule	17.3969
1990	TTOX	Urticaria	1.2426
1990	TTOX	Vasodilatation	4.5781
1990	TYP	Anaphylactoid reaction	3.2731
1990	TYP	Arthralgia	5.1251
1990	TYP	Asthenia	4.7949
1990	TYP	Back pain	1.1902
1990	TYP	Cellulitis	3.7406
1990	TYP	Chills	4.8654
1990	TYP	CSF test abnormal	3.6367
1990	TYP	Diarrhoea	6.8054
1990	TYP	Dizziness	2.4985
1990	TYP	Dysphagia	2.7276
1990	TYP	Guillain-Barre syndrome	1.169
1990	TYP	Haemolytic anaemia	65.4612
1990	TYP	Headache	1.6213
1990	TYP	Hepatic function abnormal	2.1117
1990	TYP	Hypersensitivity	1.7227
1990	TYP	Hypertension	3.1172
1990	TYP	Hypertonia	1.844
1990	TYP	Hyporeflexia	4.6758
1990	TYP	Hypotension	6.8907
1990	TYP	Immediate post-injection reaction	65.4612
1990	TYP	Injection site hypersensitivity	2.2685
1990	TYP	Injection site mass	2.6449
1990	TYP	Laboratory test abnormal	35.3845
1990	TYP	Leukocytosis	1.8703
1990	TYP	Leukopenia	24.548
1990	TYP	Lymphadenopathy	1.7935
1990	TYP	Lymphangitis	65.4612
1990	TYP	Malaise	1.1033
1990	TYP	Muscle twitching	1.6785
1990	TYP	Myalgia	2.2911
1990	TYP	Myoclonus	7.2735
1990	TYP	Nausea	1.4335
1990	TYP	Orthostatic hypotension	65.4612
1990	TYP	Pruritus	1.079
1990	TYP	Quadriplegia	65.4612
1990	TYP	Serum sickness	77.7352
1990	TYP	Skin ulcer	43.6408
1990	TYP	Tachycardia	2.182
1990	TYP	Tremor	2.0298
1990	TYP	Vasodilatation	2.0186
1990	TYP	Visual disturbance	2.6184
1990	VARCEL	Erythema	1142.8
1990	VARCEL	Malaise	19.0467
1990	YF	Arthralgia	3.7819
1990	YF	Back pain	20.7661
1990	YF	Coordination abnormal	47.5889
1990	YF	Dry mouth	228.427
1990	YF	Headache	3.461
1990	YF	Myalgia	5.5443
1990	YF	Paraesthesia	14.7372
1990	YF	Pruritus	6.2072
1990	YF	Sinusitis	126.904
1990	YF	Urticaria	8.1581
